# Supplementary material for: The effect of partial dissolution on sea-ice chemical transport: a combined model–observational study using poly- and perfluoroalkylated substances (PFASs)
Source: Copernicus journal article supplement (doi:10.5194/tc-17-3193-2023), 2023-08-08
Supplement: Supplementary file 1 [file tc-17-3193-2023-supplement.pdf]

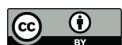

*Supplement of*

**The effect of partial dissolution on sea-ice chemical transport: a combined model–observational study using poly- and perfluoroalkylated substances (PFASs)**

**Max Thomas et al.**

*Correspondence to:* Max Thomas ([max.thomas@otago.ac.nz](mailto:max.thomas@otago.ac.nz))

The copyright of individual parts of the supplement might differ from the article licence.

## S1 Introduction

Here, we present two figures to support the main analysis. The main results of the paper are replicated with the critical Rayleigh number,  $Ra_c$ , and desalination strength,  $\epsilon$ , as  $Ra_c = 4.89$  and  $\epsilon = 5.84 \times 10^{-4} \text{ kg(m}^3\text{s)}^{-1}$ , following Griewank and Notz (2015).

## 5 S2 Results

Fig. S1 shows the derived tuning parameters for each chemical of interest for Methods B, C, and D when the model was run with tuning parameters from Griewank and Notz (2015). Fig. S2 shows the model performance for Methods A through D. These figures are discussed in the main text, in Section 4.

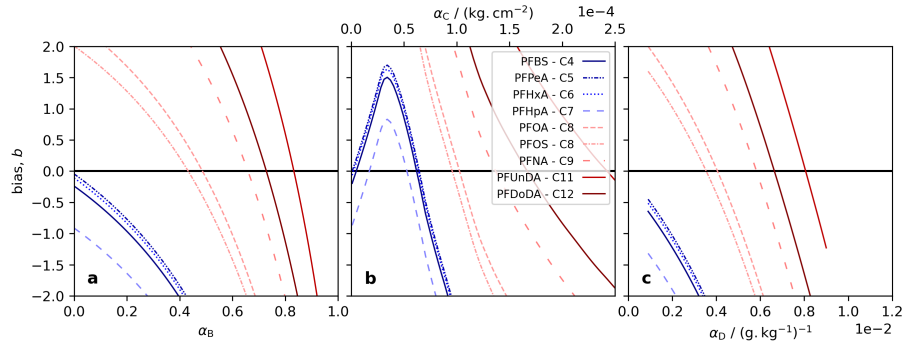

**Fig. S 1.** Model tuning for each PFAS. The bias,  $b$ , was calculated as the sum of the difference between measurements and co-located model layers in three tuning runs. Each panel shows results for a different decoupling method: a) simple decoupling, tuned using  $\alpha_B$ ; b) surface area adsorption, tuned using  $\alpha_C$ ; and c) salinity mediated decoupling, tuned using  $\alpha_D$ . The best performing  $\alpha$  give  $b$  closest to 0 (black line). Tuning parameters for desalination were taken from Griewank and Notz (2015).

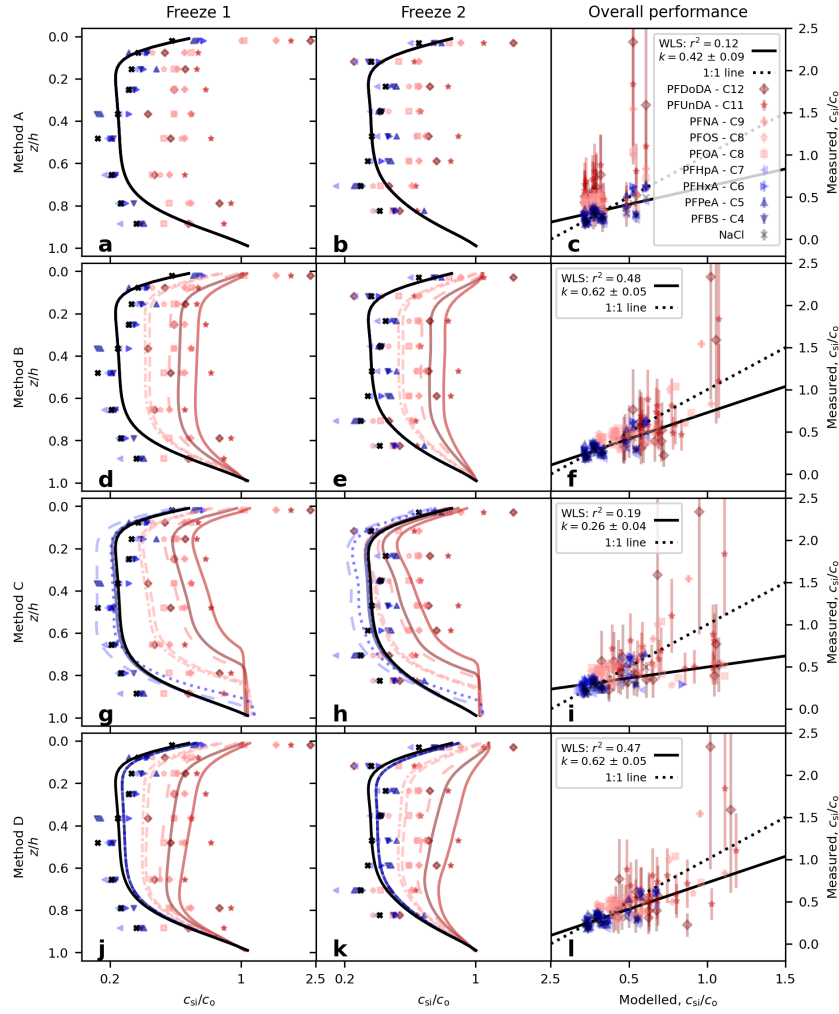

**Fig. S 2.** Comparison of modelled and measured concentration for: Method A, perfectly dissolved chemicals (a, b, c); Method B, simple decoupling (d, e, f); Method C, surface area adsorption (g, h, i); and Method D, salinity mediated decoupling (j, k, l). Depth profiles are shown for Freeze 1 (a, d, g, j) and Freeze 2 (b, e, h, k). Modelled against measured concentrations are shown in panels c, f, i, and l, alongside the best fit weighted least squares (WLS) regression (black line, gradient  $k$  with one standard error and coefficient of determination  $r^2$  shown in legend) and the theoretical 1 to 1 line for perfect model behavior (dotted black). Concentration for the profiles is given on a log scale to highlight separation between the profiles. Tuning parameters for desalination were taken from Griewank and Notz (2015).

## References

- 10 Griewank, P. J. and Notz, D.: A 1-D modelling study of Arctic sea-ice salinity, *The Cryosphere*, 9, 305–329, <https://doi.org/10.5194/tc-9-305-2015>, 2015.
